# Supplementary material
Source: PubMed Central journal article supplement (PMC6728576)
Supplement: DS_10.1177_0022034517749506.pdf [file DS_10.1177_0022034517749506.pdf]

## Oral Sciences PhD Program Enrollment, Graduates, and Placement: 1994-2016

C.R. Herzog, D.W. Berzins, P. DenBesten, R.L. Gregory; K.M. Hargreaves, R.L.W. Messer, M. Mina, M.P. Mooney, M.L. Paine, C. Phillips, R.B. Presland, R.G. Quivey, F.A. Scannapieco, J.F. Sheridan, K.K.H. Svoboda, P.C. Trackman, M.P. Walker, S.G. Walker, C.Y. Wang, J.C.C. Hu

### Appendix

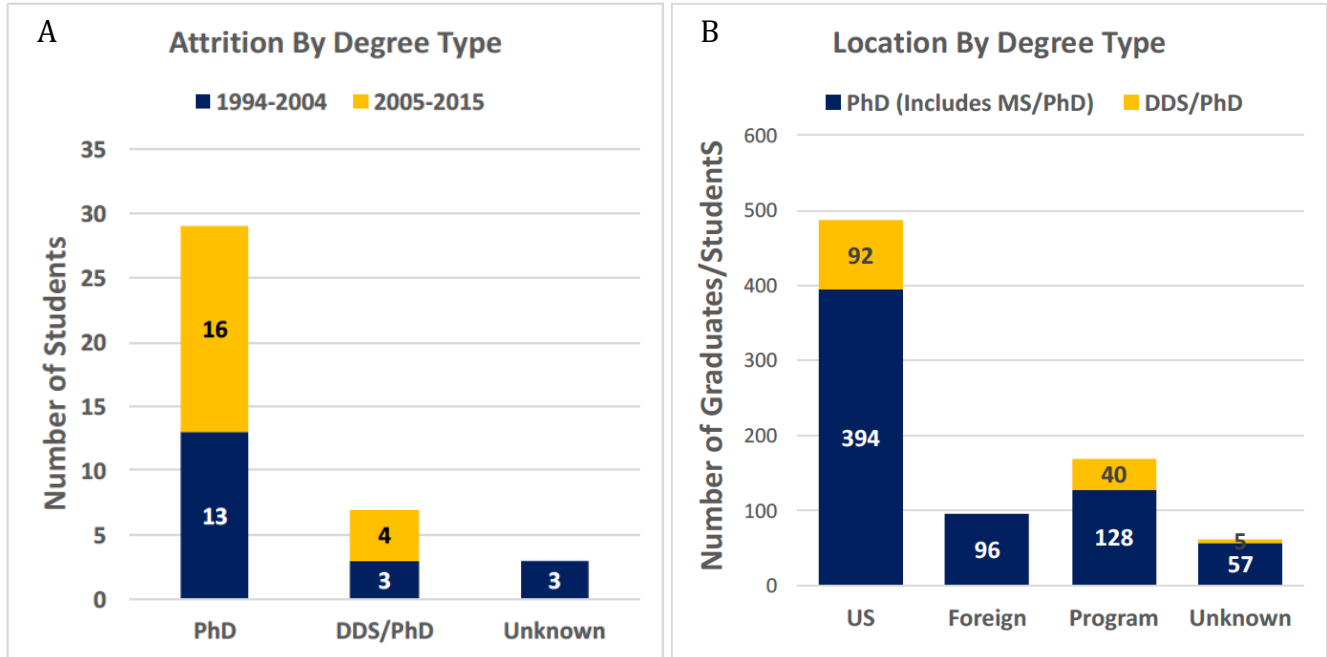

Appendix Figure 1. Oral Sciences Ph.D. program students' and graduates' (A) attrition, and (B) location by degree type from 1994 to 2016 based on the data from 22 programs.

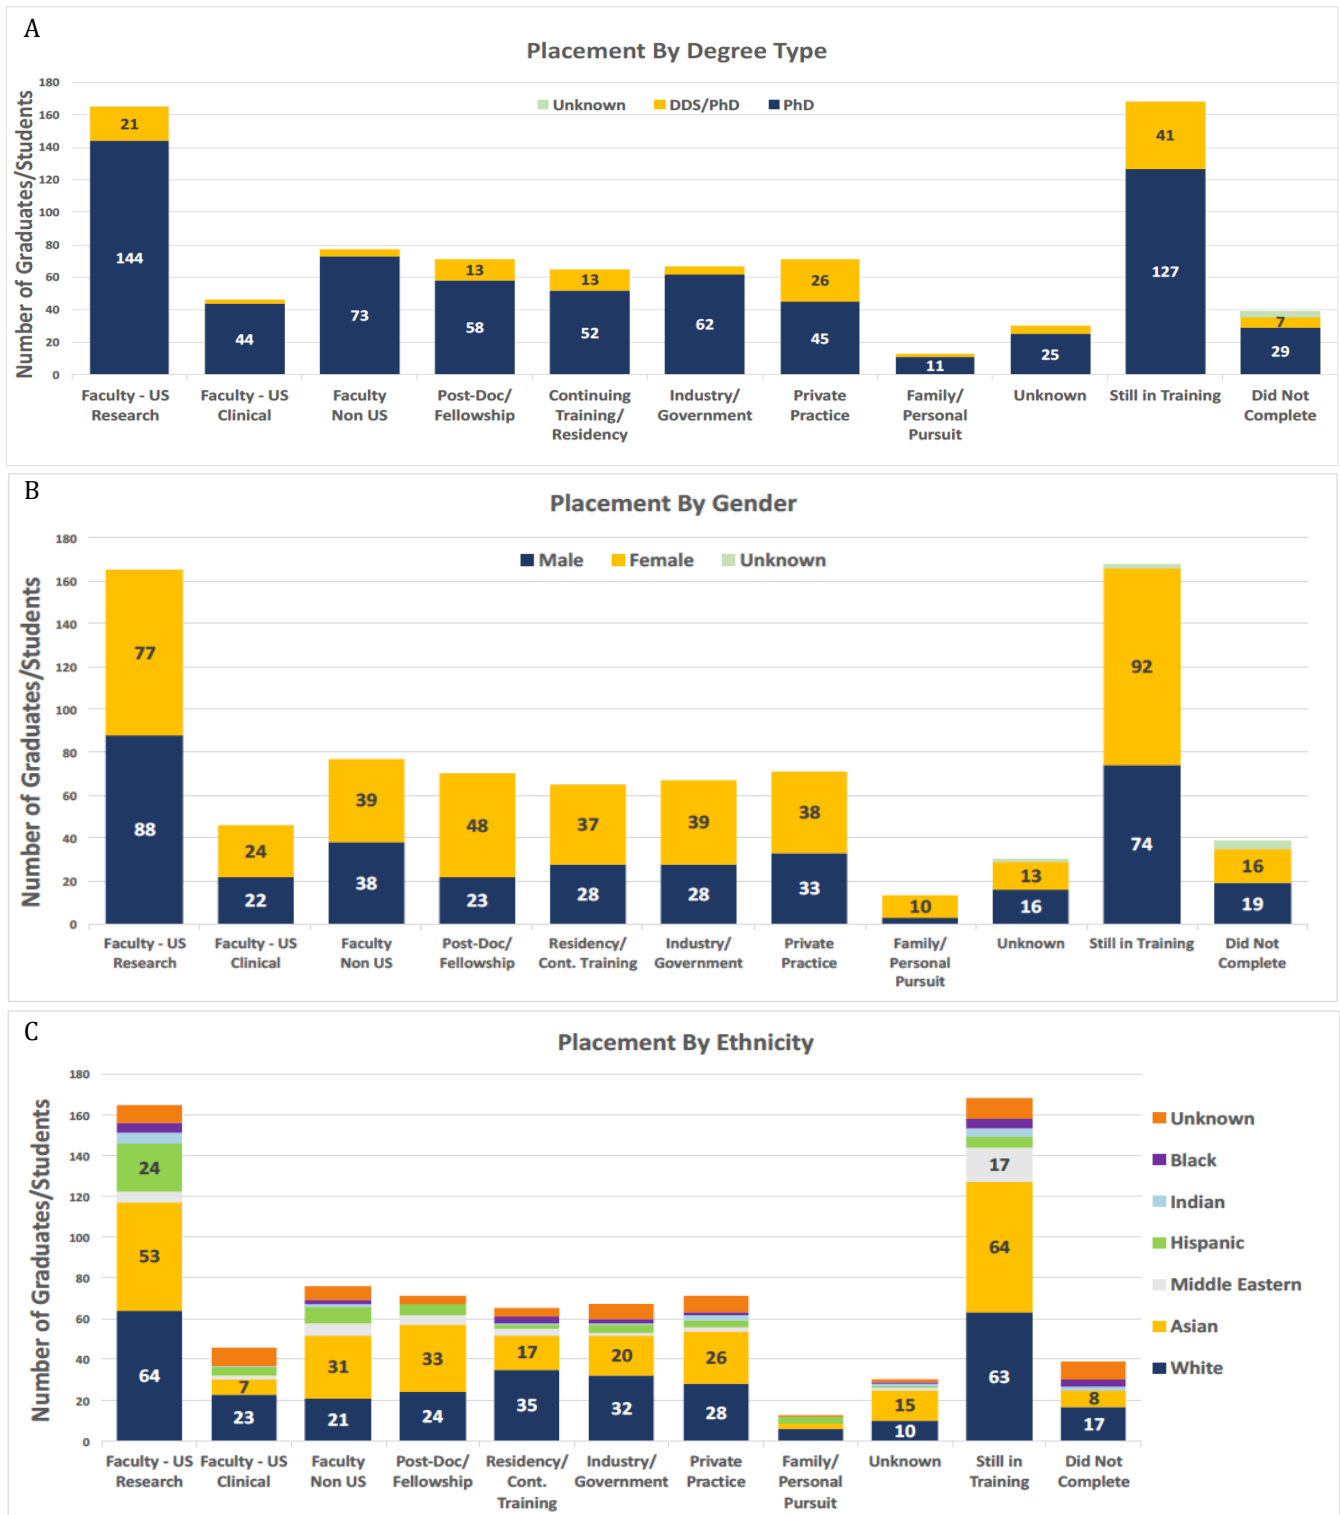

Appendix Figure 2. Oral Sciences Ph.D. program students' and graduates' placement by (A) degree type, (B) gender, and (C) ethnicity from 1994 to 2016 based on the data from 22 programs.

Appendix Table 1. Oral Sciences Ph.D. program students' and graduates' placement by year. Placement in 1994-2003 and 2004-2013 were compared. Excluding those "Still in Training" and "Did not Complete", the ratio of graduates who entered academia in the U.S. was 119/280 (42.5%) in 1994 - 2003 and 70/283 (24.7%) in 2004 - 2013.

| Year of Initial Enrollment | Faculty - US - Research Focus | Faculty - US - Clinical/ Education | Faculty - Non US | Post-Doc/ Fellowship | Continuing Training/ Residency | Industry/ Government | Private Practice | Family/ Personal Pursuit | Unknown   | Still in Training | Did Not Complete | Subtotal   |
|----------------------------|-------------------------------|------------------------------------|------------------|----------------------|--------------------------------|----------------------|------------------|--------------------------|-----------|-------------------|------------------|------------|
| 1994                       | 6                             | 0                                  | 4                | 0                    | 1                              | 3                    | 3                | 2                        | 0         | 0                 | 1                | 20         |
| 1995                       | 7                             | 5                                  | 3                | 0                    | 3                              | 2                    | 4                | 1                        | 0         | 0                 | 0                | 25         |
| 1996                       | 7                             | 2                                  | 3                | 0                    | 0                              | 2                    | 3                | 0                        | 1         | 0                 | 1                | 19         |
| 1997                       | 8                             | 4                                  | 4                | 0                    | 2                              | 0                    | 2                | 0                        | 0         | 0                 | 2                | 22         |
| 1998                       | 7                             | 3                                  | 0                | 0                    | 2                              | 5                    | 4                | 0                        | 4         | 0                 | 3                | 28         |
| 1999                       | 10                            | 3                                  | 1                | 1                    | 6                              | 2                    | 6                | 2                        | 0         | 0                 | 2                | 33         |
| 2000                       | 16                            | 0                                  | 3                | 0                    | 2                              | 5                    | 3                | 0                        | 3         | 0                 | 1                | 33         |
| 2001                       | 12                            | 2                                  | 3                | 4                    | 4                              | 5                    | 7                | 1                        | 1         | 0                 | 3                | 42         |
| 2002                       | 11                            | 2                                  | 4                | 2                    | 0                              | 9                    | 6                | 0                        | 1         | 0                 | 3                | 38         |
| 2003                       | 10                            | 4                                  | 3                | 5                    | 1                              | 6                    | 5                | 2                        | 0         | 0                 | 1                | 37         |
| 2004                       | 10                            | 5                                  | 3                | 3                    | 1                              | 4                    | 4                | 1                        | 1         | 0                 | 2                | 34         |
| 2005                       | 8                             | 3                                  | 6                | 5                    | 2                              | 7                    | 3                | 0                        | 0         | 0                 | 0                | 34         |
| 2006                       | 9                             | 2                                  | 6                | 0                    | 4                              | 1                    | 4                | 0                        | 1         | 0                 | 1                | 28         |
| 2007                       | 4                             | 1                                  | 6                | 7                    | 11                             | 8                    | 4                | 1                        | 0         | 0                 | 3                | 45         |
| 2008                       | 9                             | 0                                  | 4                | 8                    | 5                              | 2                    | 2                | 0                        | 1         | 1                 | 3                | 35         |
| 2009                       | 4                             | 1                                  | 10               | 9                    | 10                             | 0                    | 3                | 0                        | 0         | 3                 | 2                | 42         |
| 2010                       | 4                             | 3                                  | 6                | 15                   | 1                              | 1                    | 1                | 1                        | 3         | 4                 | 3                | 42         |
| 2011                       | 3                             | 2                                  | 6                | 5                    | 2                              | 1                    | 0                | 0                        | 4         | 11                | 4                | 38         |
| 2012                       | 1                             | 1                                  | 1                | 3                    | 4                              | 0                    | 0                | 2                        | 2         | 19                | 2                | 35         |
| 2013                       | 0                             | 0                                  | 1                | 3                    | 2                              | 0                    | 0                | 0                        | 2         | 28                | 1                | 37         |
| 2014                       | 0                             | 0                                  | 0                | 0                    | 0                              | 0                    | 0                | 0                        | 1         | 27                | 0                | 28         |
| 2015                       | 0                             | 0                                  | 0                | 0                    | 0                              | 0                    | 0                | 0                        | 0         | 42                | 1                | 43         |
| 2016                       | 0                             | 0                                  | 0                | 0                    | 0                              | 0                    | 0                | 0                        | 0         | 33                | 0                | 33         |
| <b>Subtotal</b>            | <b>146</b>                    | <b>43</b>                          | <b>77</b>        | <b>70</b>            | <b>63</b>                      | <b>63</b>            | <b>64</b>        | <b>13</b>                | <b>25</b> | <b>168</b>        | <b>39</b>        | <b>771</b> |
| <b>1986-1993</b>           | <b>19</b>                     | <b>3</b>                           | <b>0</b>         | <b>1</b>             | <b>2</b>                       | <b>4</b>             | <b>7</b>         | <b>0</b>                 | <b>5</b>  | <b>0</b>          | <b>0</b>         | <b>41</b>  |
| <b>1994-2003</b>           | <b>94</b>                     | <b>25</b>                          | <b>28</b>        | <b>12</b>            | <b>21</b>                      | <b>39</b>            | <b>43</b>        | <b>8</b>                 | <b>10</b> | <b>0</b>          | <b>17</b>        | <b>297</b> |
| <b>2004-2013</b>           | <b>52</b>                     | <b>18</b>                          | <b>49</b>        | <b>58</b>            | <b>42</b>                      | <b>24</b>            | <b>21</b>        | <b>5</b>                 | <b>14</b> | <b>66</b>         | <b>21</b>        | <b>370</b> |
| <b>2014-2016</b>           | <b>0</b>                      | <b>0</b>                           | <b>0</b>         | <b>0</b>             | <b>0</b>                       | <b>0</b>             | <b>0</b>         | <b>0</b>                 | <b>1</b>  | <b>102</b>        | <b>1</b>         | <b>104</b> |
